# Supplementary material for: Modulating retinoid-X-receptor alpha (RXRA) expression sensitizes chronic myeloid leukemia cells to imatinib in vitro and reduces disease burden in vivo
Source: PubMed Central journal article supplement (PMC10264673; doi:10.3389/fphar.2023.1187066), 2023-05-31
Supplement: DataSheet1.pdf [file DataSheet1.pdf]

## Supplementary Material

### Modulating Retinoid-X-Receptor Alpha (RXRA) expression sensitizes chronic myeloid leukemia cells to imatinib in-vitro and reduces disease burden in-vivo

Bharathi M Rajamani<sup>1</sup>, Raveen Stephan Stallon Illangeswaran<sup>1</sup>, Esther Sathya Bama Benjamin<sup>1</sup>, Balaji Balakrishnan<sup>1\*</sup>, Daniel Zechariah Paul J<sup>1</sup>, Saswati Das<sup>1</sup>, Aswin Anand Pai<sup>1</sup>, Rakhi TV<sup>1</sup>, Ajith Mohan<sup>1</sup>, Sreeja Karathedath<sup>1</sup>, Aby Abraham<sup>1</sup>, Vikram Mathews<sup>1</sup>, Shaji R. Velayudhan<sup>1, 2</sup>, Poonkuzhali Balasubramanian<sup>1</sup>

\* **Correspondence:** Poonkuzhali Balasubramanian, Professor, Department of Haematology,

Christian Medical College, Vellore - [bpoonkuzhali@cmcvellore.ac.in](mailto:bpoonkuzhali@cmcvellore.ac.in)

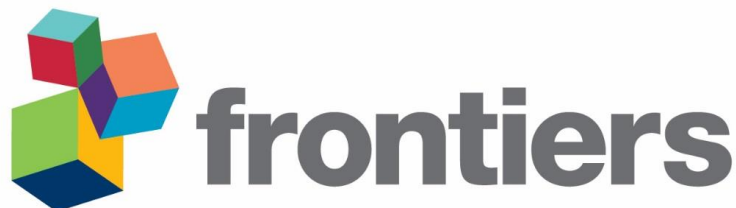

**Supplementary table 1:** List of NHR ligands and concentrations used.

**Supplementary Figure 1:** Heatmap representation of basal RNA expression profile of NHRs & coregulators in CML cell lines normalized with five housekeeping genes (*ACTB*, *GAPDH*, *B2M*, *HGPRT* & *RPLP0*). Data were analyzed using the SA biosciences web-based analysis tool, and  $2^{-\Delta\text{dCT}}$  was calculated.

**Supplementary Figure 2:** Primary CML cells pretreated with NHR ligands (A) ATRA, (B) 17- $\beta$ -estradiol, (C) Pioglitazone, (D) Triiodothyronine, and (E) 9cis retinoic acid for 24 hours followed by imatinib treatment for 48 hours and in-vitro cytotoxicity was assessed, and the change in IC-50 between imatinib alone vs. in combination with ligand was calculated using paired t-test.

**Supplementary Figure 3:** Primary CML cells were treated with RXRA ligands, and the IC50 to imatinib was compared between those who achieved MMR (n=14) and those who did not achieve MMR (n=16) at 12 months. P-value was calculated by Tukey's multiple comparison test

**Supplementary Figure 4:** Effect of RXRA ligands in healthy donor cells. PBMNCs (n=4) were treated with (A) 9cRA, (B) Bexa, and (C) ACI for 24 hours, followed by imatinib for 48 hours; in-vitro cytotoxicity assay was performed.

**Supplementary Figure 5:** Fold change in the RNA expression of *RARA*, *VDR*, and *PPARG* in primary CML cells treated with Aci n=12, 9cRA n=14 & Bexa n=12 compared to untreated cells. The p-value was calculated by Tukey's multiple comparison test.

**Supplementary Figure 6:** (A) KCL22 and (B) Lama84 cell lines were treated with RXRA ligands for 24 hours, followed by 2<sup>nd</sup> generation TKIs dasatinib and nilotinib for 48 hours and the percentage apoptosis (Annexin-V and 7AAD positive cells) was measured using flow cytometry. P-value calculated by Tukey's multiple comparison test.

**Supplementary Figure 7:** The number of viable cells in Lama84 EV vs. RXRA OE cells was assessed using trypan blue exclusion assay (n=3) at three different time points. The doubling time was calculated using exponential analysis, and the p-value was calculated using the Mann-Whitney U test.

**Supplementary Figure 8:** The quantitative measure of mitochondrial membrane potential using the ratio of JC-1 dimer by JC-1 monomer in RXRA ligand treated CML cell lines (A) KCL22 (B) Lama84. Values represented as percentage change in MMP compared to vehicle treated.

**Supplementary Figure 9:** Effect of acitretin in healthy donor (A) PBMNCs and (B) CD34<sup>+</sup> cells (n=5) apoptosis assay was performed. The percentage of live cells (Annexin-V and 7AAD negative cells) was measured using flow cytometry. (C) Outline and Development of RXRA overexpression in-vivo xenograft CML mouse model. (D) Representative flow plot for human CD45 expression in the bone marrow and splenic cells from EV and RXRA OE cells
